# Supplementary material for: Activation of P53 pathway contributes to Xenopus hybrid inviability
Source: PubMed Central journal article supplement — Proc Natl Acad Sci U S A. 2023 May 15;120(21):e2303698120. doi: 10.1073/pnas.2303698120 (PMC10214167; doi:10.1073/pnas.2303698120), 2023-05-15
Supplement: pnas.2303698120.sapp.pdf [file pnas.2303698120.sapp.pdf]

## Supporting Information for

Activation of P53 pathway contributes to *Xenopus* hybrid inviability

Zhaoying Shi<sup>†</sup>, Guanghui Liu<sup>†</sup>, Hao Jiang<sup>†</sup>, Songyuan Shi, Xuan Zhang, Yi Deng,  
Yonglong Chen\*

Yonglong Chen

Email: [chenyl@sustech.edu.cn](mailto:chenyl@sustech.edu.cn)

### This PDF file includes:

Figures S1 to S8

Tables S1



**Figure S1. Phenotype characterization of  $t_e \times t_s$  embryos using RNA-seq analysis.** (A) Representative images of wild-type and hybrid embryos. Identical results were obtained with more than 6 times of independent cross-fertilization experiments. Scale bars, 200  $\mu$ m. (B) Pearson's correlation of the RNA-seq profiles from stage 8 to stage 11. s, stage. (C) Principal component analysis (PCA) of transcriptomes showing strong maternal effects during early development. (D) Gene ontology (GO) terms enriched in up-regulated genes between  $t_e \times t_s$  and  $Xt^{WT}$  at stage 9. The red boxes highlight genes enriched in cell cycle arrest. (E) KEGG pathway enrichment analysis for down-regulated genes between  $t_e \times t_s$  and  $Xt^{WT}$  at stage 10. Wnt and Hedgehog signaling pathways were down-regulated. (F) KEGG pathway enrichment analysis for differentially expressed metabolism genes. Red boxes highlight enrichment of P53 and FoxO pathways during stages 9-11.



**Figure S2. Robust P53 stabilization was induced in  $I_s \times t_s$  hybrids, X-ray-irradiated embryos, and linear plasmid DNA-injected embryos.** (A) Western blot data show that no P53 stabilization was induced in  $I_s \times t_s$  hybrids. Stable low levels of P53 protein could be detected in both  $Xl^{WT}$  and  $I_s \times t_s$  stage 8 and 10 embryos. As expected, the full-length P53 of *X. laevis* is smaller than that of *X. tropicalis* (compared to F). s, stage;  $\beta$  Tubulin, loading control. Identical results were obtained in three independent experiments. (B) Relatively stable *tp53* RNA levels in  $Xl^{WT}$  and  $t_e \times t_s$  embryos at 4 different developmental stages, as revealed by RNA-seq analysis. Error bars, SD. (C) Relatively stable *tp53* RNA levels in  $Xl^{WT}$  and  $I_s \times t_s$  embryos at 4 different developmental stages, as revealed by RNA-seq analysis. Error bars, SD. (D)  $\Delta 99tp53$  RNA levels in  $Xl^{WT}$  and  $t_e \times t_s$  embryos at 4 different developmental stages, as revealed by RNA-seq analysis. Error bars, SD. (E)

Representative images show the developmental arrests of  $Xt^{WT}$  embryos induced by cycloheximide (400  $\mu$ M),  $\alpha$ -amanitin (2 ng), triptolide (2 ng), or aphidicolin (400  $\mu$ M). Identical results were obtained in three independent experiments. Scale bar, 200  $\mu$ m. **(F)** Western blot data show the detection of P53 stabilization in  $t_e \times I_s$  hybrids, as well as in  $Xt^{WT}$  embryos subjected to various treatments as indicated. Identical results were obtained in three independent experiments.  $\beta$  Tubulin was used as a loading control. **(G)** Western blot data show induction of P53 stabilization and Caspase 3 activation in stage 11 wild-type *X. laevis* embryos upon X-ray irradiation at stage 6. Identical results were obtained in three independent experiments.  $\beta$  Tubulin was used as a loading control. **(H)** Western blot data show dose-dependent stabilization of P53 protein in *X. tropicalis* embryos upon injection of linear plasmid DNA. Identical results were obtained in three independent experiments. s, stage;  $\beta$  Tubulin, loading control. **(I)** Western blot data showing dose-dependent stabilization of P53 in  $Xt^{WT}$  embryos upon injection of linear plasmid DNA. Identical results were obtained in three independent experiments.  $\beta$  Tubulin, loading control. **(J)** Representative images showing gastrulation defects in  $Xt^{WT}$  embryos induced by exogenous DNA in a dose-dependent manner. Identical results were obtained in three independent experiments. Scale bars, 200  $\mu$ m. **(K)** Heatmaps showing relative expression of all differential expression genes among the four groups of embryos at stage 11 (4,197 genes with  $q < 0.05$  and absolute fold change  $> 2$ ). **(L)** GO term enrichment analysis of stage 11 overlapping differential expression genes between the  $t_e \times I_s$  group and the 80 pg DNA injection group. **(M)** KEGG pathway enrichment analysis of stage 11 overlapping differential expression genes between the  $t_e \times I_s$  group and the 80 pg DNA injection group. Of note, P53 and FoxO pathways were identified.



**Figure S3. Activation of P53 signaling pathway in stage 9  $t_e \times l_s$  embryos.** (A) Genomic distribution of P53 ChIP-seq signals from  $Xt^{WT}$  and  $t_e \times l_s$ . (B) Motif enrichment of  $t_e \times l_s$  P53 ChIP-seq peaks showing P53 itself as the most enriched one. (C) Heatmaps showing correlation of up-regulated ATAC-seq signals with increased P53, RNA Pol II, H3K4me1, H3K27ac, and H3K4me3 ChIP-seq signals in stage 9  $t_e \times l_s$  versus  $Xt^{WT}$ . Heatmaps were centered at open chromatin summits. Regions were ranked by the average open chromatin within 1 kb of the peak. The no change regions (4000) were randomly picked from all no change regions (50876). (D) Representative genome tracks showing transcriptional activation of P53 target gene *cdkn1a* (the *X. tropicalis* version) in  $t_e \times l_s$  embryos at stage 9. (E) Representative genome tracks showing transcriptional activation of paternal (*X. laevis*) P53 target genes *ccng1.l*, *ccng1.s*, and *foxl1.s* (the *X. laevis* version) in  $t_e \times l_s$  embryos at stage 9.

Top 30 hub genes identified in the PPI networks of  $t_e \times I_s$  VS  $Xt^{WT}$  differential expression genes



**Figure S4. P53 regulates significant number of up-regulated top hub genes between  $t_e \times I_s$  and  $Xt^{WT}$ .** Heatmaps showing the top 30 hub genes identified in the PPI networks of differentially expressed genes between  $t_e \times I_s$  and  $Xt^{WT}$  from stage 9 to stage 11. Genes in red were covered by corresponding P53 ChIP-seq signals.



**Figure S5. Dynamics of P53 and FoxO signaling pathway activities in  $t_6 \times I_s$  during stages 8-11. (A) P53 signaling pathway. (B) FoxO signaling pathway. Applying all the differentially expressed genes between  $t_6 \times I_s$  and  $XI^{WT}$  from stage 8 to stage 11 to these two pathways revealed the activity dynamics of these two pathways during these developmental stages in  $t_6 \times I_s$ . Up- and down-regulated genes were marked in red and yellow, respectively. These charts were generated on the KEGG PATHWAY Database and drawn by hand.**



**Figure S6. Inhibition of P53 activity rescued the early lethality of  $t_e^x_{l_e}$  hybrids, as well as the gastrulation defects of  $Xt^{WT}$  embryos induced by low doses of X-ray irradiation. (A) A schematic showing**

CRISPR/Cas9-mediated *tp53* knockout strategy in *X. tropicalis*. **(B)** Statistics on the survival rates of indicted embryos from three independent experiments based on NF stages and developing time (h). Error bars, SD. **(C)** Representative images showing three ways of rescuing the lethality of  $t_e \times I_s$ . Identical results were obtained in three independent experiments. Scale bars, 200  $\mu$ m. **(D)** Representative images of stage 12 embryos show that disruption of *tp53* can hardly rescue gastrulation defects induced by X-ray irradiation at doses above 5 Gy. Identical results were obtained in three independent experiments. Scale bar, 200  $\mu$ m. **(E)** Western blot data of stage 11 embryos confirmed no P53 stabilization and revealed no caspase 3 activation in  $X^{tp53/-}$  embryos upon X-ray irradiation. Identical results were obtained in three independent experiments.  $\beta$  Tubulin was used as a loading control. **(F)** Western blot data of stage 9 embryos confirm expression of proper Mdm2 and Dnp53 proteins when the corresponding mRNAs were injected into  $t_e \times I_s$  hybrid embryos.  $\beta$  Tubulin was used as a loading control. **(G)** Representative images show that disruption of *tp53* was able to rescue the gastrulation defect in *X. tropicalis* induced by 5 Gy of X-ray, allowing for the formation of normal neurulae. Identical results were obtained in three independent experiments. Scale bar, 200  $\mu$ m.



**Figure S7. Molecular evidence of rescuing  $t_e \times I_s$  lethality via inhibition of P53 activity. (A)** Heatmaps showing rescue of the up- and down-regulated ATAC-seq peaks between stage 9  $t_e \times I_s$  and  $Xt^{WT}$  via knockout of maternal  $tp53$  gene ( $t_e^{tp53-/-} \times I_s$ ). **(B)** Representative *X. tropicalis* genome tracks show the activation of  $\Delta 99tp53$  transcription in stage 9  $t_e \times I_s$  embryos, which was rescued by depletion of maternal P53. The red dashed box highlights the internal promoter region for *X. tropicalis*  $\Delta 99tp53$  transcription. **(C)** Heatmaps showing the relative expression of the 165 previously reported metabolism genes<sup>2</sup> in stage 9 embryos as indicated. Genes in red were covered by corresponding P53 ChIP-seq signals.



**Figure S8. P53 pathway as the top one identified by comparative analysis of paternal genome-specific data between  $t_e \times I_s$  and  $t_e^{tp53-/-} \times I_s$ .** (A) ATAC-seq heatmaps based on *X. laevis* genome and the enriched motifs showing P53 binding motif as the most enriched one in the down-regulated peaks between  $t_e \times I_s$  and  $t_e^{tp53-/-} \times I_s$  at stage 9. (B) Heatmaps showing the distribution of ATAC-seq signals in different noncoding RNA gene loci and pseudogene in *X. laevis* genome. (C) Heatmaps showing relative expression of differential expression genes from paternal (*X. laevis*) genome between  $t_e \times I_s$  and  $t_e^{tp53-/-} \times I_s$  embryos at stage 9 (741 genes with  $q < 0.05$  and absolute fold change  $> 2$ ). Top 30 up- and down-regulated hub genes were identified by PPI analysis. Genes in red were covered by P53 ChIP-seq signals. (D) KEGG pathway enrichment analysis of differentially regulated genes from *X. laevis* genome between  $t_e \times I_s$  and  $t_e^{tp53-/-} \times I_s$  embryos at stage 9 identifies P53 and FoxO pathways (red box) as the top down-regulated ones. (E) Representative *X. laevis* genome tracks showing rescue of activated P53 target gene transcription upon depletion of maternal P53.

**Table S1.** Sequences of primers for the cloning of four *X. tropicalis* genes and amplification of the pBluescript II SK+ plasmid

|                                                                                                                            |                                                                                      |
|----------------------------------------------------------------------------------------------------------------------------|--------------------------------------------------------------------------------------|
| <p><i>X. tropicalis dnp53</i><br/>(<i>X. tropicalis tp53</i><br/>NCBI Nucleotide<br/>accession no.<br/>NM_001001903.1)</p> | <i>xt.tp53-F</i> : cggatagaaacagagcgaccg                                             |
|                                                                                                                            | <i>xt.tp53-R</i> : gagcccccaaacacataatga                                             |
|                                                                                                                            | pCS- <i>dnp53-F1</i> :<br>ttcgaattcaaggcctatggaaccttctctgagaccggcatgtccagtgaccctccac |
|                                                                                                                            | pCS- <i>dnp53-R1</i> :<br>gtggagggtcactggacatgccggtctcagaagaagggtccataggcctgaattcgaa |
|                                                                                                                            | pCS- <i>dnp53-F2</i> : tcttctgagaccggcatgtccagtgaccctccacttccc                       |
|                                                                                                                            | pCS- <i>dnp53-R2</i> : actcactatagttctagatcactcggagtctctgcagctc                      |
|                                                                                                                            | <i>xt.dnp53-4×HA-F</i> :<br>actgttcttttgaggatcccatcgatggaaccttctctgagaccggc          |
|                                                                                                                            | <i>xt.dnp53-4×HA-R</i> :<br>tatggatagccggggcccatggttctagactcggagtctctgcagctc         |
| <p><i>X. tropicalis mdm2</i><br/>(NCBI Nucleotide<br/>accession no.<br/>NM_001244760)</p>                                  | <i>xt.mdm2-F</i> : aagtaagataaaaacggctggaaga                                         |
|                                                                                                                            | <i>xt.mdm2-R</i> : tgccaaataagggtgtctaaagatc                                         |
|                                                                                                                            | <i>xt.mdm2-4×HA-F</i> :<br>actgttcttttgaggatcccatcgatggtggaggaggagagggtgc            |
|                                                                                                                            | <i>xt.mdm2-4×HA-R</i> :<br>tatggatagccggggcccatggttctagagctaaagtatgtagcagatc         |
| <p><i>X. tropicalis bcl2</i><br/>(NCBI Nucleotide<br/>accession no.<br/>XM_002934396)</p>                                  | <i>xt.bcl2-F</i> :gctgtttgagtagtctgggcg                                              |
|                                                                                                                            | <i>xt.bcl2-R</i> :taaattgtcggatggtgaggct                                             |
| <p><i>X. tropicalis xiap</i><br/>(NCBI Nucleotide<br/>accession no.<br/>XM_031890487)</p>                                  | <i>xt. xiap-F</i> :ttgtgaaataggcctgttacatg                                           |
|                                                                                                                            | <i>xt. xiap-R</i> :gaagcagccatactgtttgtctag                                          |
| <p>dsDNA amplification</p>                                                                                                 | pBS-F : actcactatagggcgaattgggtac                                                    |
|                                                                                                                            | pBS-R : ctactaaaggaacaaaagctgg                                                       |
